# Supplementary material for: Inhibition of CRTH2-mediated Th2 activation attenuates pulmonary hypertension in mice
Source: PubMed Central journal article supplement — J Exp Med. 2018 Aug 6;215(8):2175–95. doi: 10.1084/jem.20171767 (PMC6080901; doi:10.1084/jem.20171767), 2018-08-06
Supplement: JEM_20171767_sm.pdf [file JEM_20171767_sm.pdf]

## Supplemental material

Chen et al., <https://doi.org/10.1084/jem.20171767>

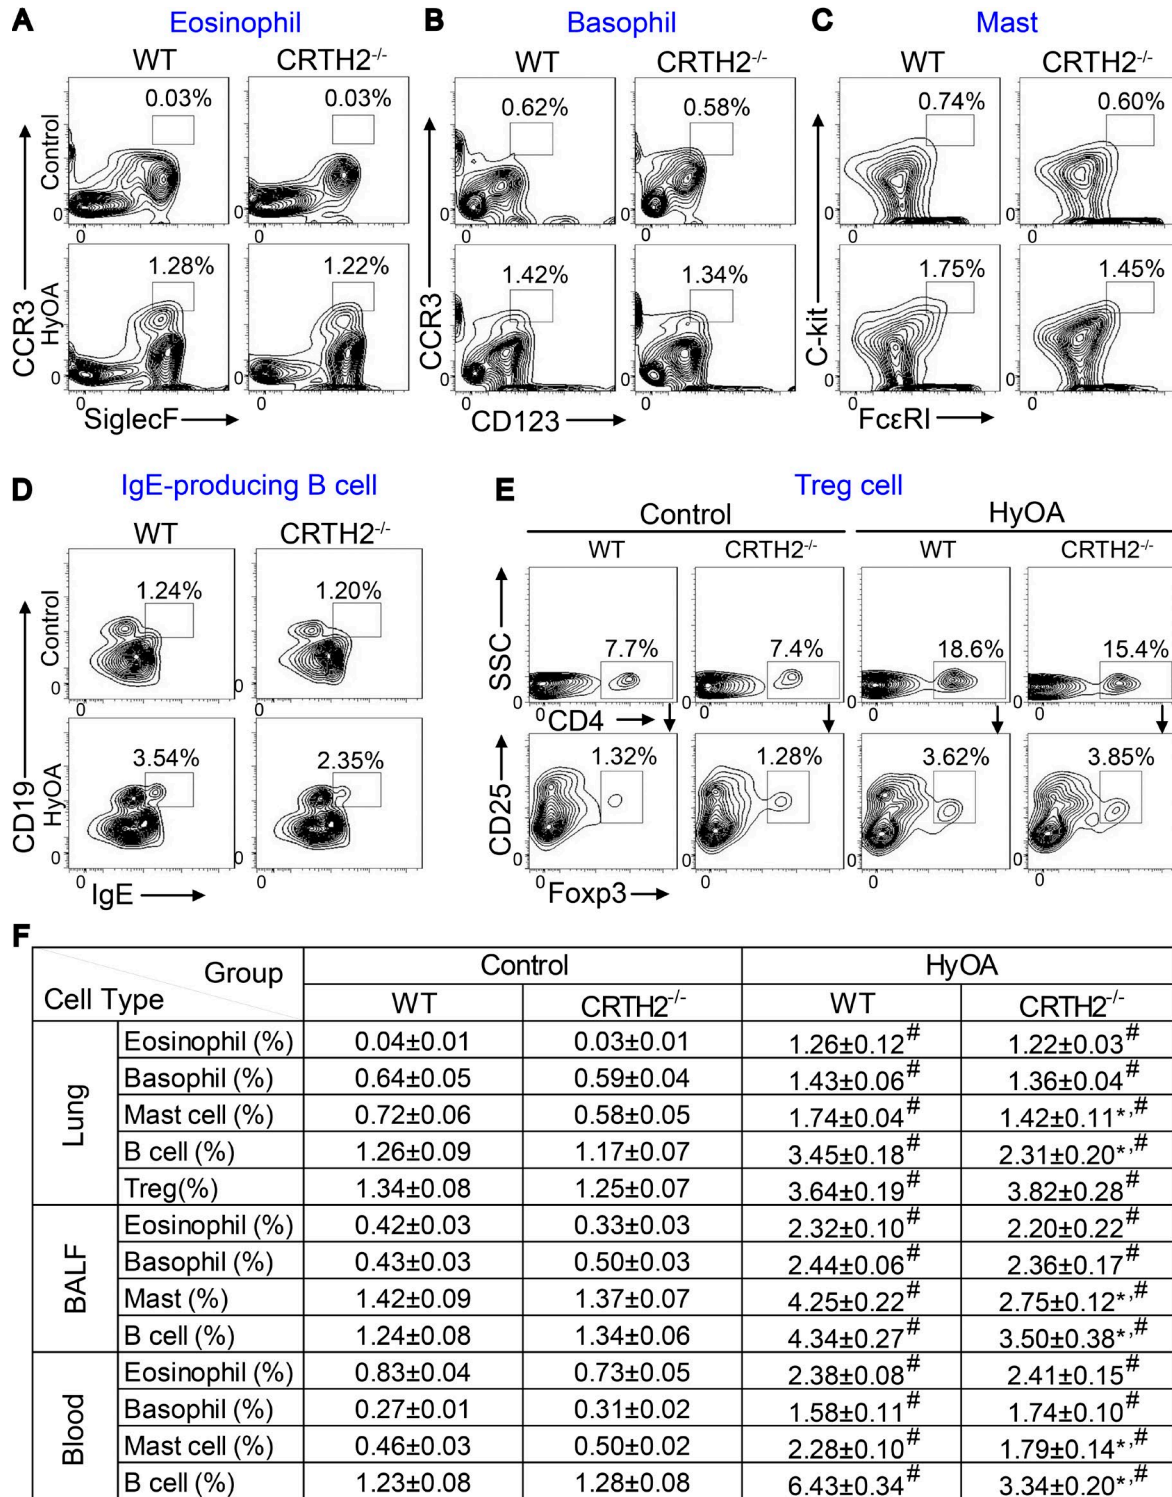

Figure S1. **Effect of CRTH2 deficiency on Th2 response-associated cell response in lung tissue, BALF, and peripheral blood in HyOA-induced mice.** (A-E) Representative flow cytometry charts of the frequency of eosinophils (CCR3<sup>+</sup>SiglecF<sup>+</sup>; A), basophil (CCR3<sup>+</sup>CD123<sup>+</sup>; B), mast cells (c-kit<sup>+</sup>FcεRI<sup>+</sup>; C), IgE-producing B cells (CD19<sup>+</sup>IgE<sup>+</sup>; D), and T reg cells (CD4<sup>+</sup>CD25<sup>+</sup>FoxP3<sup>+</sup>; E) in lung tissues of HyOA-treated mice. (F) Quantification of the frequency of eosinophils, basophils, mast cells, IgE-producing B cells, and T reg cells in lung tissues, BALF, and peripheral blood of HyOA-treated WT and CRTH2<sup>-/-</sup> mice. *n* = 6–8 mice per group. \*, *P* < 0.05 versus WT; #, *P* < 0.05 versus control. All graphs are shown as mean ± SEM. Data are representative of at least two independent experiments. Statistical significance was determined using two-way ANOVA followed by a Bonferroni post hoc test and unpaired Student's *t* tests.

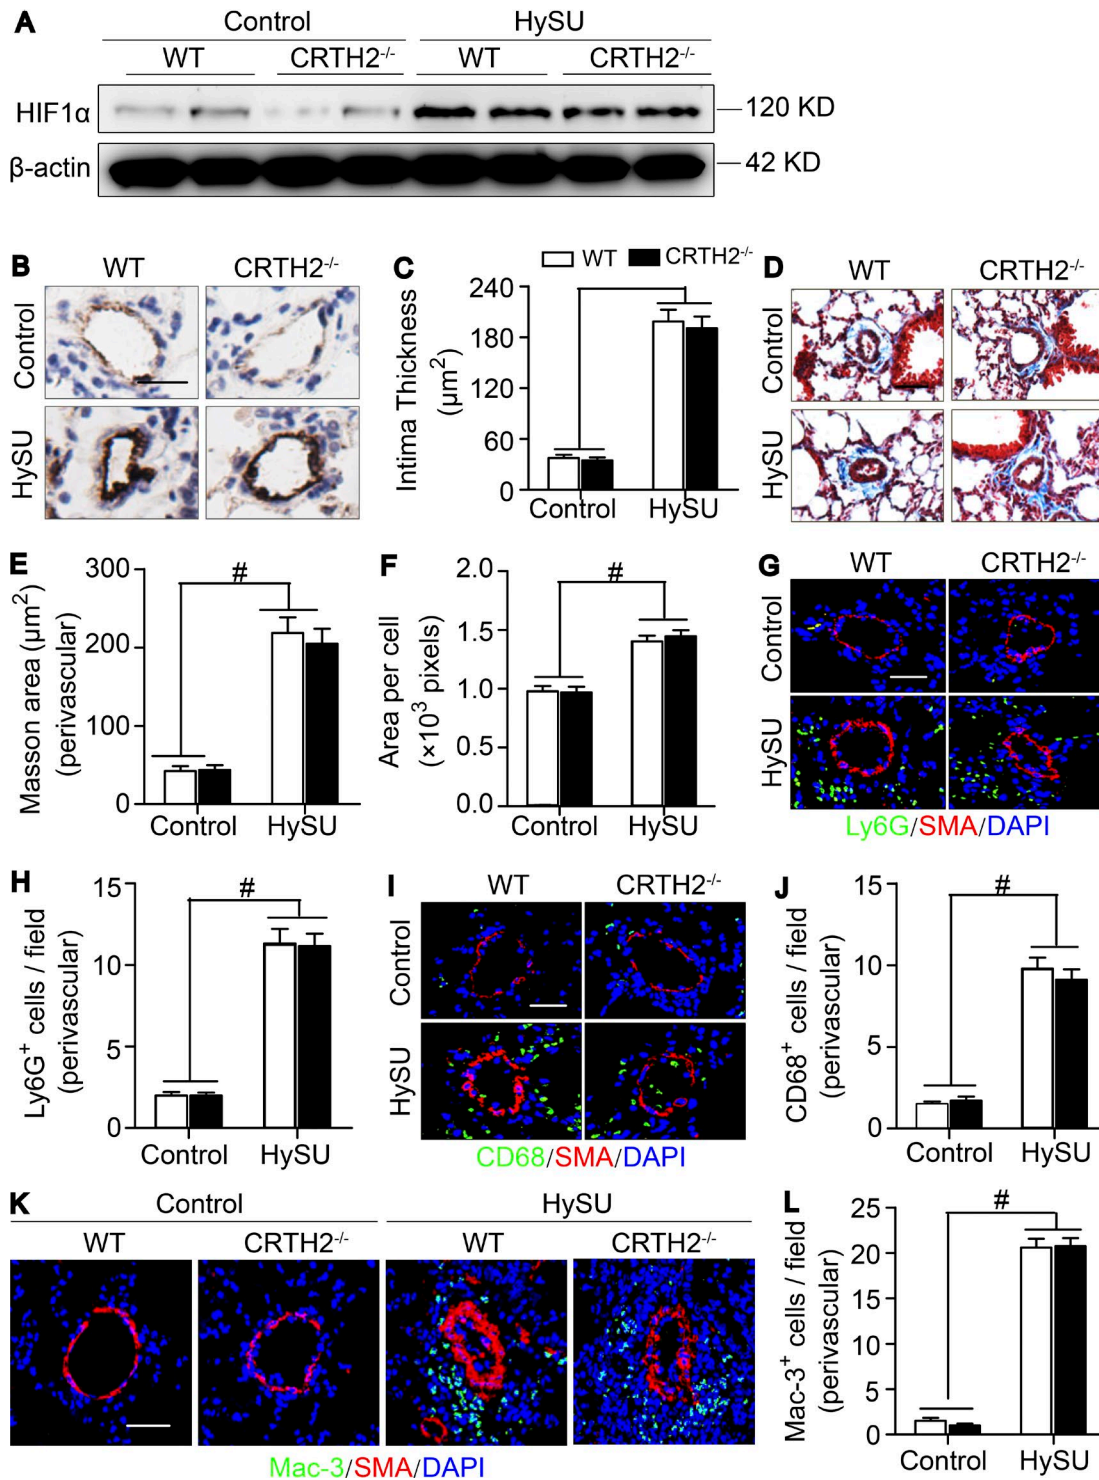

Figure S2. **Pathological characterization of HySU-induced PAH in CRTH2<sup>-/-</sup> mice.** (A) Western blot analysis of HIF-1α protein level in lung tissues of HySU-induced mice. (B) Representative images of immunohistochemical staining of von Willebrand factor in lung tissues from HySU-treated WT and CRTH2<sup>-/-</sup> mice. Bar, 20 μm. (C) Quantification of the thickness of the intima of PAs by Image-Pro Plus in B. (D) Representative images of Masson's trichrome staining of lung tissues from HySU-treated WT and CRTH2<sup>-/-</sup> mice. Bar, 20 μm. (E) Quantification of the perivascular collagen area in D by Image-Pro Plus. (F) Quantification of cell size of PASMCs in PAs from HySU-treated WT and CRTH2<sup>-/-</sup> mice. (G) Representative images of Ly6G immunostaining of lung sections from HySU-treated mice. Bar, 20 μm. (H) Quantification of neutrophils (Ly6G<sup>+</sup> cells) in perivascular areas shown in G. (I) Representative images of CD68 immunostaining of lung sections from HySU-treated mice. Bar, 20 μm. (J) Quantification of macrophage (CD68<sup>+</sup> cells) in perivascular areas shown in I. (K) Representative images of Mac-3 immunostaining of lung sections from HySU-treated mice. Bar, 20 μm. (L) Quantification of macrophage (Mac-3<sup>+</sup> cells) in perivascular areas shown in K. In A–K, n = 8–10 mice per group. #, P < 0.05 as indicated. All data are expressed as mean ± SEM and are representative of at least two independent experiments. Statistical significance was determined using two-way ANOVA followed by a Bonferroni post hoc test and unpaired Student's t tests.

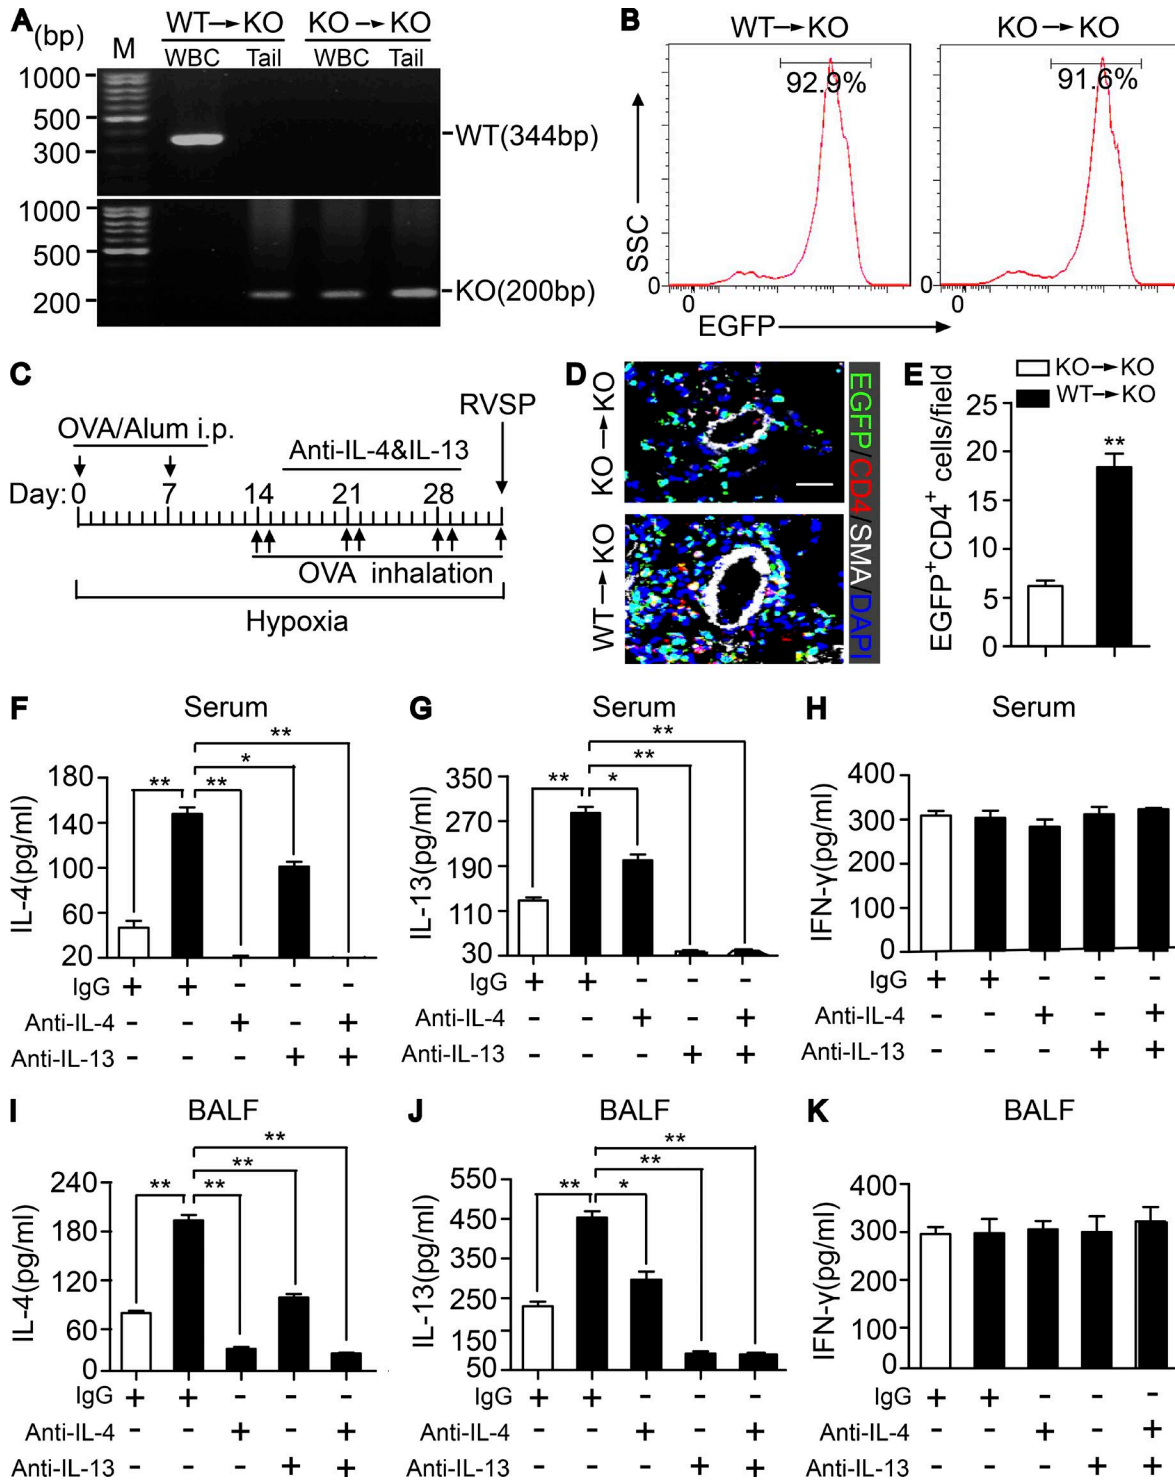

Figure S3. **CRTH2<sup>+/-</sup> BM reconstruction enhances Th2 immune response in the lungs in HyOA-treated CRTH2<sup>-/-</sup> mice.** (A) Confirmation of BMT by means of genotyping. (B) The efficacy of BM reconstitution in CRTH2<sup>-/-</sup> mice by flow cytometry. (C) Schematic representation of the protocol for administration of BM-reconstructed mice to induce PAH. (D) Representative immunofluorescence images of EGFP (green), CD4 (red), and SMA (white) in lung tissues from BM-reconstructed mice. Bar, 20 μm. (E) Quantification of perivascular EGFP<sup>+</sup>CD4<sup>+</sup> cells in lung tissues from BM-reconstructed mice as shown in D. (F–K) Quantification of IL-4 (F and I), IL-13 (G and J), and IFN-γ (H and K) levels in the serum (F–H) and BALF (I–K) from HyOA-treated KO→KO and WT→KO mice with or without dual neutralization of IL-4 and IL-13. In A–K, *n* = 8–10 mice per group. \*, *P* < 0.05; \*\*, *P* < 0.01 as indicated. Representative data are shown as mean ± SEM derived from at least two independent experiments. Statistical significance was determined using unpaired Student's *t* tests. SSC, side scatter; WBC, white blood cell.

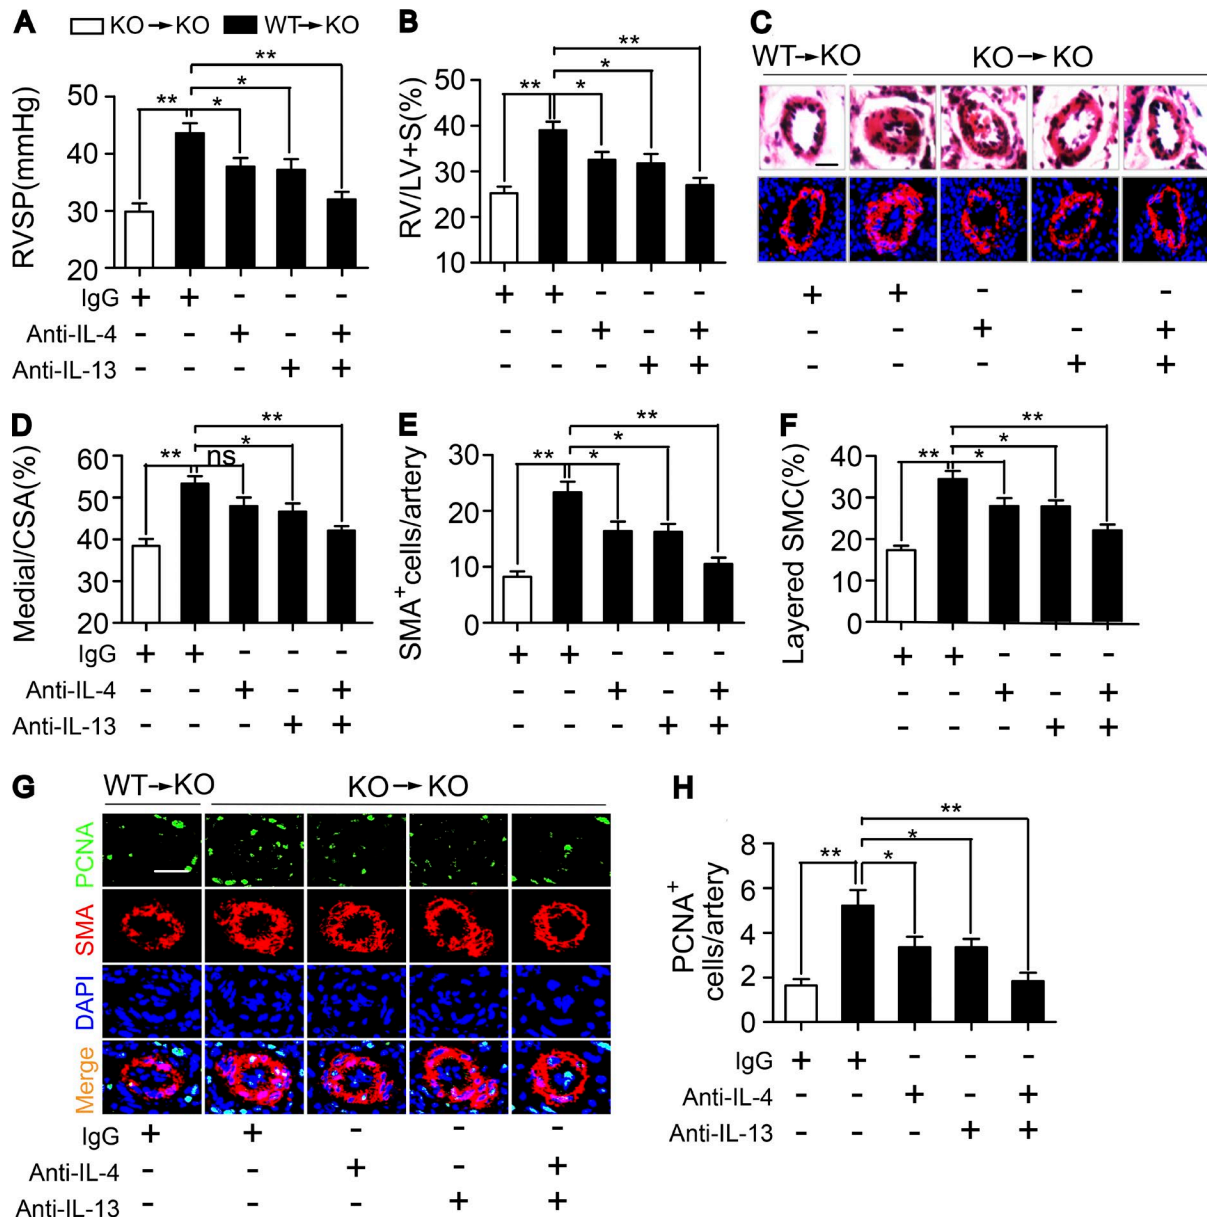

Figure S4. **CRTH2<sup>+/+</sup> BMT aggravates HyOA-induced PAH in CRTH2<sup>-/-</sup> mice by increasing IL-4 and IL-13 secretion.** (A and B) Effect of CRTH2<sup>+/+</sup> BMT on RVSP (A) and RV/LV + S ratio (B) in HyOA-treated CRTH2<sup>-/-</sup> mice with or without dual neutralization of IL-4 and IL-13. (C) Representative images of H&E staining and SMA (red) immunostaining of PAs of BM-reconstituted mice with or without dual neutralization of IL-4 and IL-13. Bar, 20  $\mu$ m. (D) Quantification of the ratio of pulmonary arterial medial thickness to total vessel size (media/CSA) for the BM-reconstructed mice. (E and F) Quantification of the number (E) and percentages (F) of layered SMCs in PAs from BM-reconstructed mice. (G) Representative PCNA (green) and  $\alpha$ -SMA (red) immunostaining of lung sections from BM-reconstructed mice. Bar, 20  $\mu$ m. (H) Quantification of PCNA<sup>+</sup> cells in PAs. In A–H,  $n = 8$ –10 mice per group. \*,  $P < 0.05$ ; \*\*,  $P < 0.01$  as indicated. All data are shown as mean  $\pm$  SEM and are representative of at least two independent experiments. Statistical significance was determined using unpaired Student's  $t$  tests.



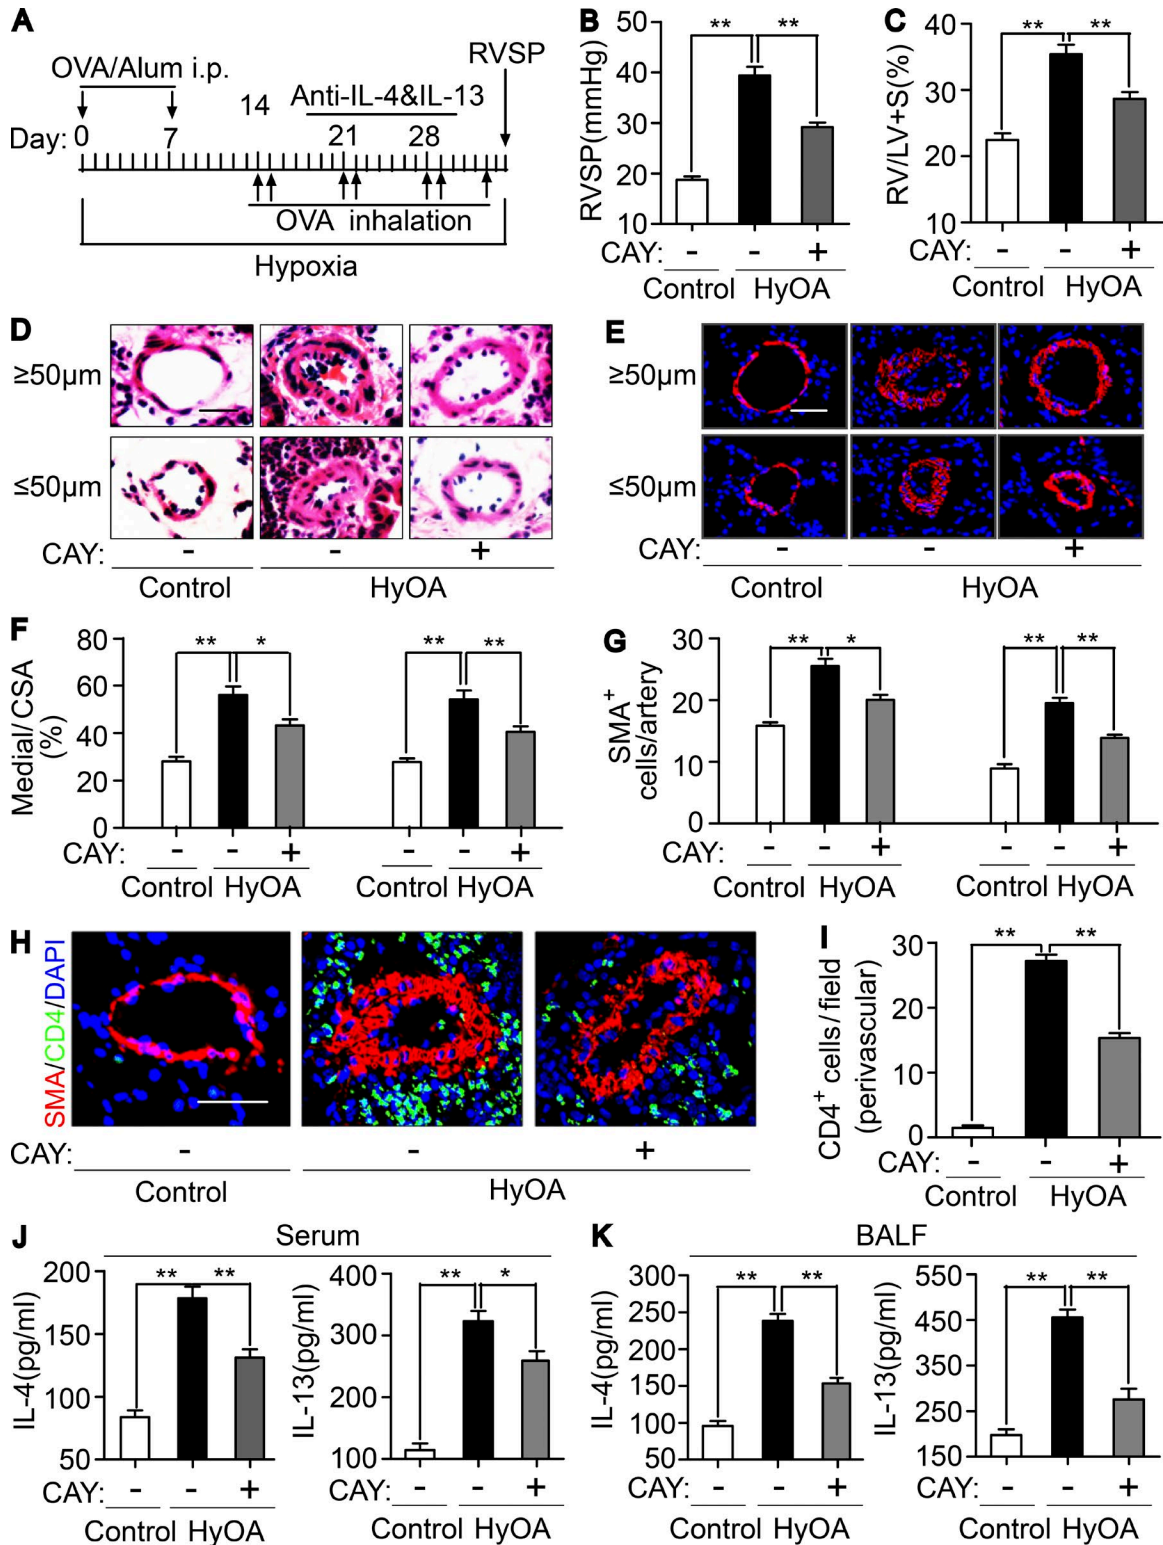

Figure S5. **Pharmacological inhibition of CRTH2 ameliorates HyOA-induced PAH in mice.** (A) Protocol for administration of CRTH2 inhibitor CAY10595 to HyOA-challenged mice. (B and C) Effect of CAY10595 administration on RVSP (B) and RV/LV + S ratio (C) of HyOA-treated mice. CAY, CAY10595. (D and E) Representative images of H&E staining (D) and SMA (red) immunostaining (E) of lung sections of HyOA-challenged mice treated with CAY10595 or equivalent volume of vehicle. Bars, 20 μm. (F and G) Quantification of the ratio of pulmonary arterial medial thickness to total vessel size (media/CSA; F) and the number of SMA<sup>+</sup> cells in PAs (G) from HyOA-challenged mice with CAY10595 treatment. (H) Representative images of CD4 (green) and SMA (red) immunostaining of lung tissues from HyOA-challenged mice treated with CAY10595. Bar, 20 μm. (I) Quantification of perivascular infiltration of CD4<sup>+</sup> cells in the lungs in HyOA-challenged mice after CAY10595 treatment. (J and K) Quantification of secretion levels of IL-4 and IL-13 in the serum (J) and BALF (K) from HyOA-challenged mice after CAY10595 treatment. In A–K, *n* = 10–12 mice per group. \*, *P* < 0.05; \*\*, *P* < 0.01 as indicated. Data are presented as mean ± SEM derived from at least two independent experiments. Statistical significance was determined using unpaired Student's *t* tests.
